# Supplementary material for: Ozonolysis of a series of C7–C9 unsaturated biogenic aldehydes: reactivity study at atmospheric pressure
Source: Royal Society of Chemistry journal article supplement (doi:10.1039/c4ra17283c), 2015-01-01
Supplement: c4ra17283c1.pdf [file c4ra17283c1.pdf]

### Supplementary Information

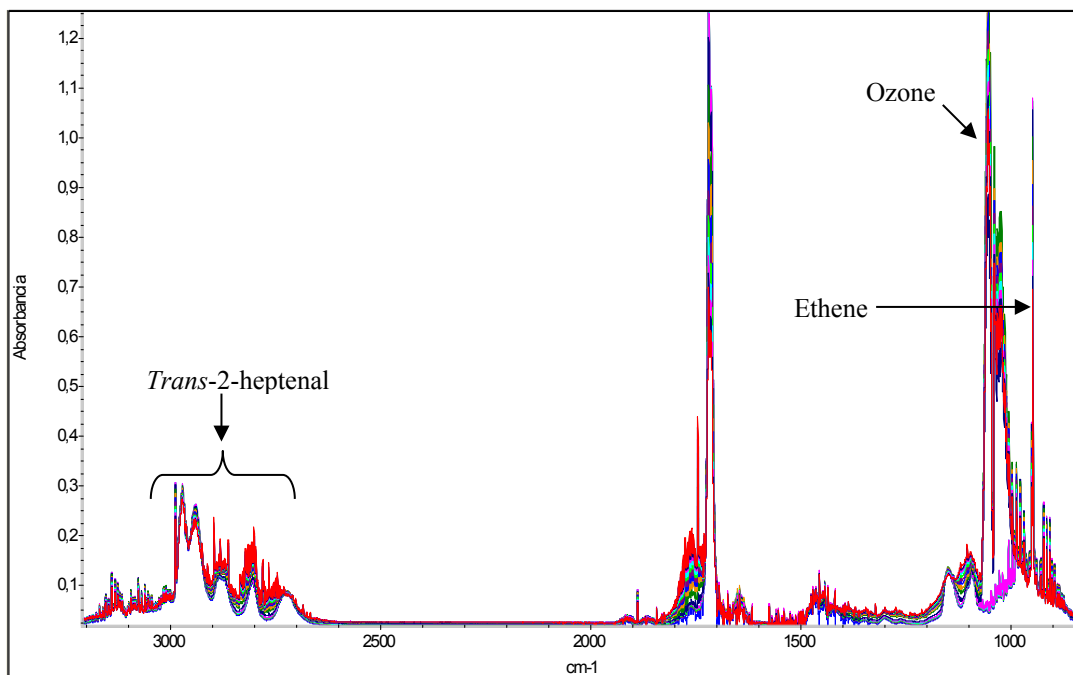

Figure S1: IR spectra obtained from the kinetic experimental study of the reaction of  $O_3$ +*trans*-2-heptenal using ethene as reference compound.

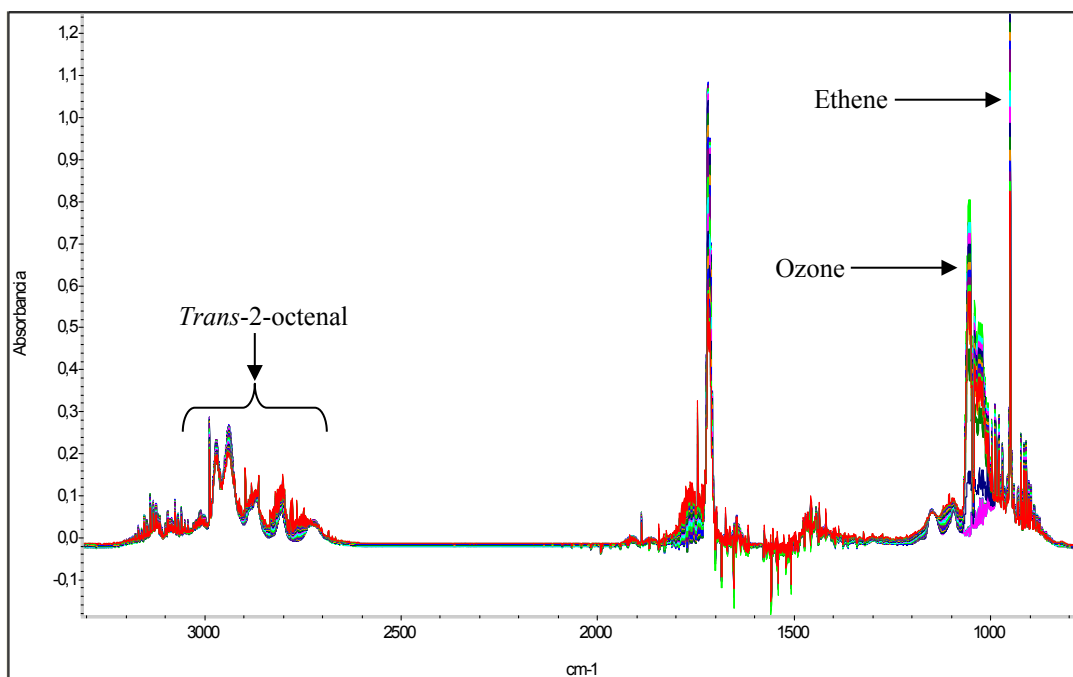

Figure S2: IR spectra obtained from the kinetic experimental study of the reaction of  $O_3$ +*trans*-2-octenal using ethene as reference compound.

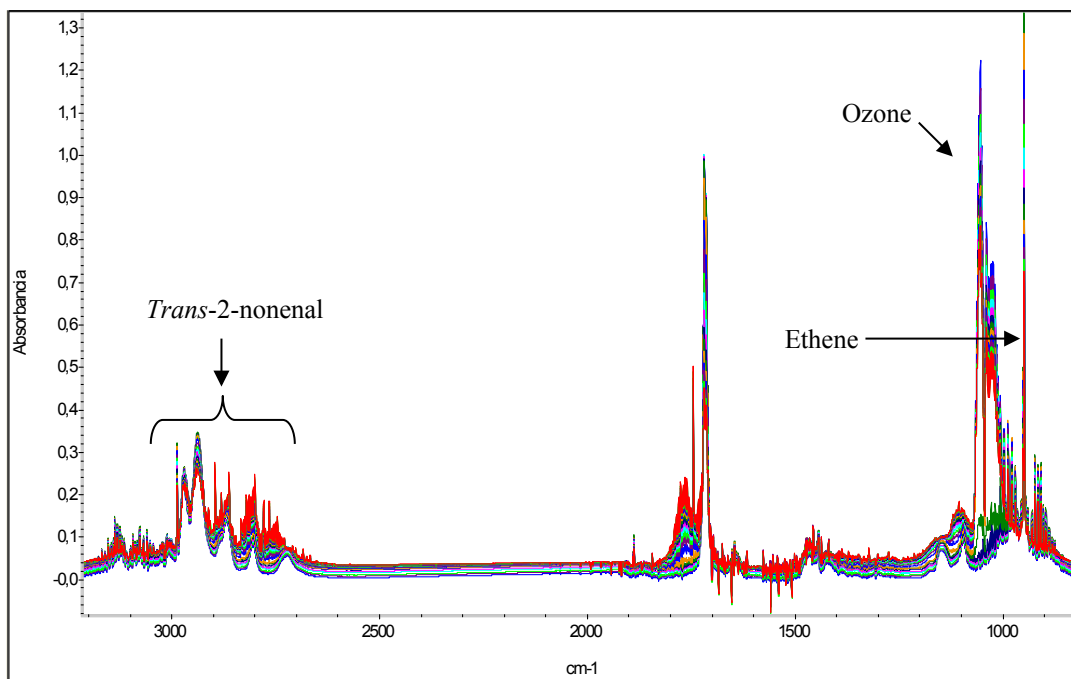

Figure S3: IR spectra obtained from the kinetic experimental study of the reaction of  $O_3$ +*trans*-2-nonenal using ethene as reference compound.

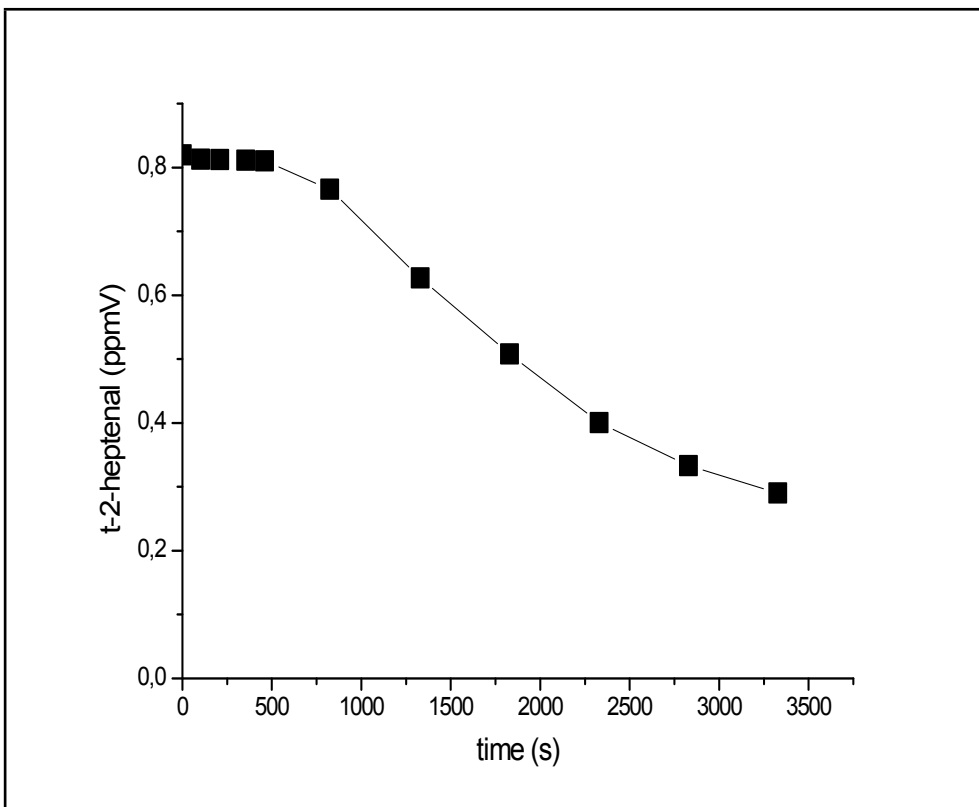

Figure S4: Concentration-time profile for *trans*-2-heptenal.

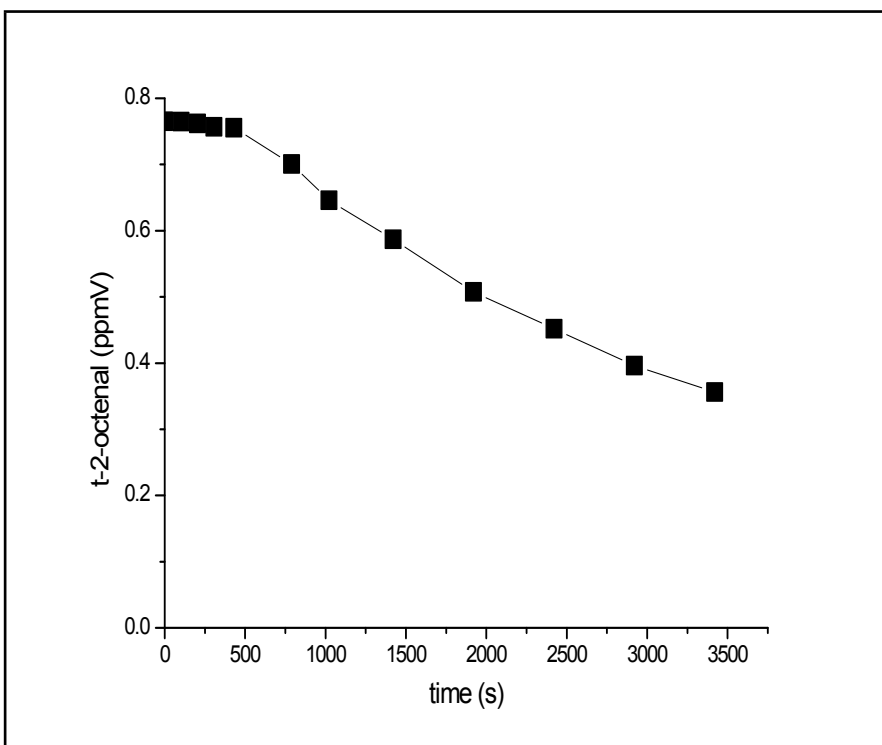

Figure S5: Concentration-time profile for *trans*-2-octenal.

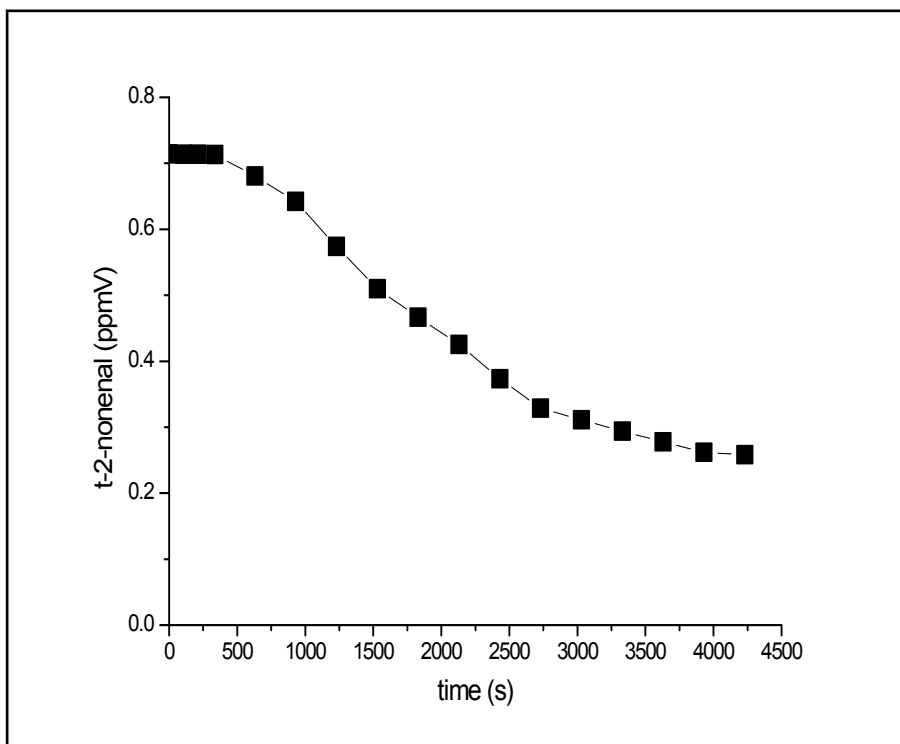

Figure S6: Concentration-time profile for *trans*-2-nonenal.
